# Supplementary material for: Unleashing the power of cobalt pyroborate: superior performance in sulfate radical advanced oxidation processes
Source: Royal Society of Chemistry journal article supplement (doi:10.1039/d4en00516c), 2024-01-01
Supplement: d4en00516c1.pdf [file d4en00516c1.pdf]

# Unleashing the Power of Cobalt Pyroborate: Superior Performance in Sulfate Radical Advanced Oxidation Processes

En-Xuan Lin, Fang-Yu Wu, Yu-Lun Zhu, Yu-Rong Chang, Po-Yi Wu, Pei Yuin Keng\*

Department of Materials Science and Engineering, National Tsing Hua University, Hsinchu  
30013, Taiwan

\* Corresponding author. Tel.: +886-3-5715131 ext. 33884; fax: +886-3-5722366; e-mail address:  
keng.py@gapp.nthu.edu.tw (P.Y.K).

**Table 1** Comparative analysis of  $\text{Co}_3\text{O}_4$  heterostructures in previous studies relative to the current work. Abbreviations for organic pollutants: 4-NP signifies 4-nitrophenol; BPA stands for bisphenol-A; PNT represents phenacetin; SDZ denotes sulfadiazine; RhB refers to Rhodamine-B; SMZ is for sulfamethoxazole; SSZ indicates sulfasalazine; CBZ is an abbreviation for carbamazepine; and TC designates tetracycline.

| Catalyst                                                                                                                | Pollutant | Reaction conditions                                                           | Performance                            | Referenc<br>e |
|-------------------------------------------------------------------------------------------------------------------------|-----------|-------------------------------------------------------------------------------|----------------------------------------|---------------|
| $\text{Co}_3\text{O}_4$ nanoparticles and N-functionalized carbon nanosheet frameworks ( $\text{Co}_3\text{O}_4$ -NCNF) | 4-NP      | [PMS] = 3 mM;<br>catalyst = 0.14 g/L;<br>[4-NP] = 20 ppm;<br>time = 60 mins   | 100.0%<br>$k = 0.137 \text{ min}^{-1}$ | [1]           |
| Ultrafine $\text{Co}_3\text{O}_4$ incorporated carbon composites ( $\text{Co}_3\text{O}_4/\text{CC}$ )                  | BPA       | [PMS] = 0.66 mM;<br>catalyst = 0.1 g/L;<br>[BPA] = 10 ppm; time<br>= 10 mins  | 97%<br>$k = 0.45 \text{ min}^{-1}$     | [2]           |
| Two-dimensional (2D) ultrathin perforated $\text{Co}_3\text{O}_4$ nanosheet                                             | BPA       | [PMS] = 0.25 mM;<br>catalyst = 0.05 g/L;<br>[SMZ] = 10 ppm;<br>time = 30 mins | 98.0%<br>$k = 0.112 \text{ min}^{-1}$  | [3]           |

|                                                                                                                                         |                     |                                                                                            |                                                                                                                                                                              |          |
|-----------------------------------------------------------------------------------------------------------------------------------------|---------------------|--------------------------------------------------------------------------------------------|------------------------------------------------------------------------------------------------------------------------------------------------------------------------------|----------|
| Co <sub>3</sub> O <sub>4</sub> anchored on biochar derived from chitosan (Co <sub>3</sub> O <sub>4</sub> @BCC)                          | PNT                 | [PMS] = 1.0 mM;<br>catalyst = 0.05 g/L;<br>[PNT] = 10 ppm; time = 15 mins                  | 100.0%<br>k = 0.32 min <sup>-1</sup>                                                                                                                                         | [4]      |
| Co <sub>3</sub> O <sub>4</sub> -MnO <sub>2</sub> nanoparticles moored on biochar (Co <sub>3</sub> O <sub>4</sub> -MnO <sub>2</sub> /BC) | SDZ                 | [PMS] = 1.0 mM;<br>catalyst = 0.1 g/L;<br>[SDZ] = 25 ppm; time = 10 mins                   | 100.0%<br>k = 0.482 min <sup>-1</sup>                                                                                                                                        | [5]      |
| Cobalt@porous carbon nanosheets                                                                                                         | 4-NP                | [PMS] = 3.9 mM;<br>catalyst = 0.16 g/L; [4-NP] = 20 ppm; time = 12 mins                    | 99.5%<br>k = 0.618 min <sup>-1</sup>                                                                                                                                         | [6]      |
| Co-doped g-C <sub>3</sub> N <sub>4</sub>                                                                                                | RhB                 | [PMS] = 0.12 mM;<br>catalyst = 0.4 g/L;<br>[RhB] = 10 ppm; time = 25 mins                  | 99%<br>k = 0.2208 min <sup>-1</sup>                                                                                                                                          | [7]      |
| C <sub>3</sub> N <sub>5</sub> -Co <sub>0.59</sub>                                                                                       | SMX                 | [PMS] = 1.0 mM;<br>catalyst = 0.5 g/L;<br>[SMX] = 10 ppm;<br>time = 20 mins                | 99.57%<br>k = 0.3515 min <sup>-1</sup>                                                                                                                                       | [8]      |
| In situ N-doped carbon-coated mulberry-like cobalt manganese oxide (HCoMnOx@NC)                                                         | SMZ, SSZ, CBZ, etc. | [PMS] = 0.3 mM;<br>catalyst = 0.1 g/L;<br>[pollutant] = 30 μM;<br>time = 30 mins           | 100% : SSZ,<br>CBZ<br>95.4% SMZ<br>k <sub>SMZ</sub> = 0.0867 min <sup>-1</sup><br>k <sub>SSZ</sub> = 0.1769 min <sup>-1</sup><br>k <sub>CBZ</sub> = 0.5069 min <sup>-1</sup> | [5]      |
| cobalt sulfide-reduced graphene oxide nanocomposite (CoS-rGO)                                                                           | RhB                 | [PMS] = 0.05 mM;<br>catalyst = 0.25 g/L;<br>[RhB] = 30 μM; time = 8 mins                   | 100%<br>k = 0.6714 min <sup>-1</sup>                                                                                                                                         | [9]      |
| Our work Co <sub>2</sub> B <sub>2</sub> O <sub>5</sub>                                                                                  | TC, 4-NP, SMX       | [PMS] = 1 mM;<br>catalyst = 0.12 g/L<br>[SMX] = 10 ppm<br>[TC] = 50 ppm<br>[4-NP] = 40 ppm | 95.2% SMX<br>k <sub>SMX</sub> = 0.092 min <sup>-1</sup><br>97.9% TC<br>k <sub>TC</sub> = 0.16 min <sup>-1</sup><br>96.8% 4-NP<br>k <sub>4NP</sub> = 0.12 min <sup>-1</sup>   | Our work |

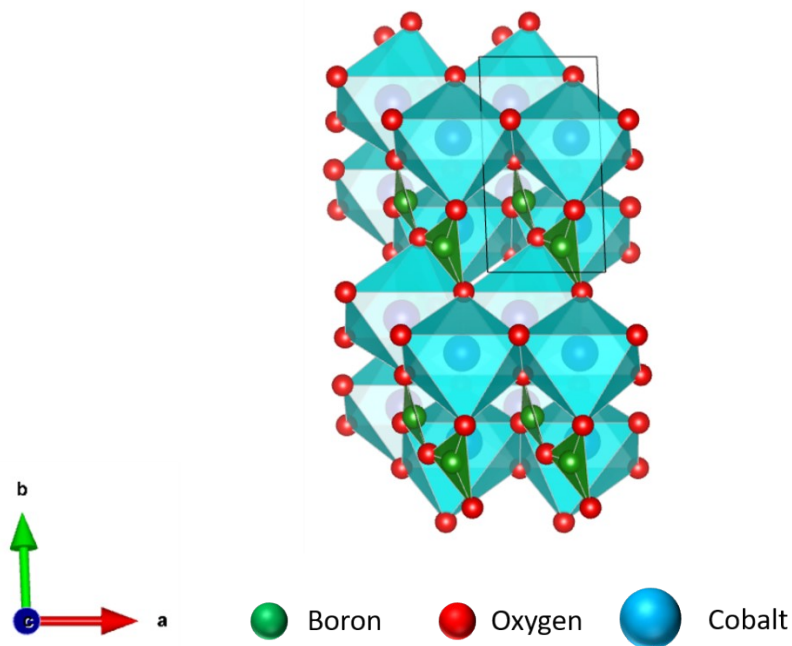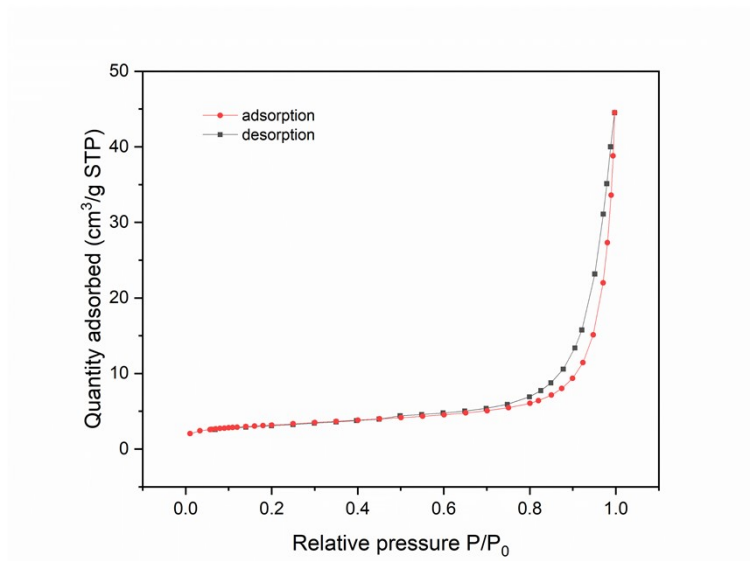

Figure S1. Crystal structure of cobalt pyroborate

Figure S2: BET isotherms using N<sub>2</sub> at 77 K of Co<sub>2</sub>B<sub>2</sub>O<sub>5</sub>

The Fourier Transform Infrared (FTIR) spectrum of Co<sub>2</sub>B<sub>2</sub>O<sub>5</sub> is presented (Fig. 4), revealing several characteristic absorption bands associated with cobalt, boron and oxygen. Notably, several peaks have been identified, including the O-H vibration at 3425.88 cm<sup>-1</sup>, as well as the asymmetric

B-O stretching peaks of the three-coordinate boron at  $1465.58\text{ cm}^{-1}$  and  $1273.52\text{ cm}^{-1}$ , and of four-coordinate boron at  $1170.05\text{ cm}^{-1}$  and  $1012.5\text{ cm}^{-1}$ . [10,11] The symmetric B-O stretching vibration of the four-coordinate boron is evident at  $906\text{ cm}^{-1}$  and  $820.88\text{ cm}^{-1}$ , while the symmetric stretching vibrations of the four-coordinate boron group emerged at  $872\text{ cm}^{-1}$ . [10,11] Additionally, the absorbance band at  $768\text{ cm}^{-1}$  can be assigned to the oxygen bridge of one tetrahedral and one tetragonal boron group. [10,11] The Co-O bond is represented by the absorption peaks at  $595.50\text{ cm}^{-1}$  and  $662.50\text{ cm}^{-1}$ , and the absorbance band at  $697.03\text{ cm}^{-1}$  is due to the O-B-O bonding. [12–15] Our FTIR results is commensurate with the XPS and XRD analyses, which confirms the structural characteristic of  $\text{Co}_2\text{B}_2\text{O}_5$ .

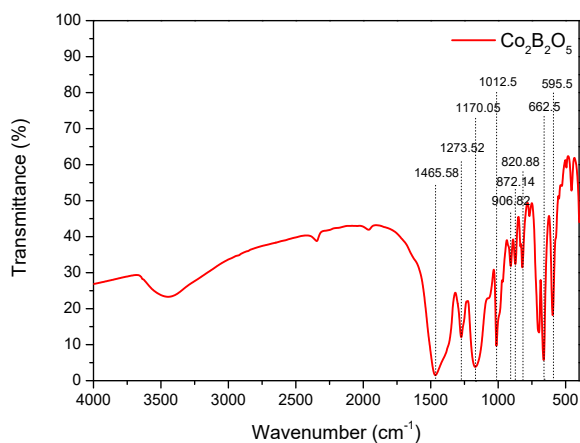

Figure S3: FTIR spectrum of  $\text{Co}_2\text{B}_2\text{O}_5$  nanoparticle

## ICP-MS

The ICP-MS analysis of the  $\text{Co}_2\text{B}_2\text{O}_5$  revealed the elemental composition of Co:B weight ratio to 0.529:0.151, which is commensurate with the theoretical value of 0.536:0.1 (Table S1). The higher proportion of boron than the ideal value may be due to the residual portion of boric

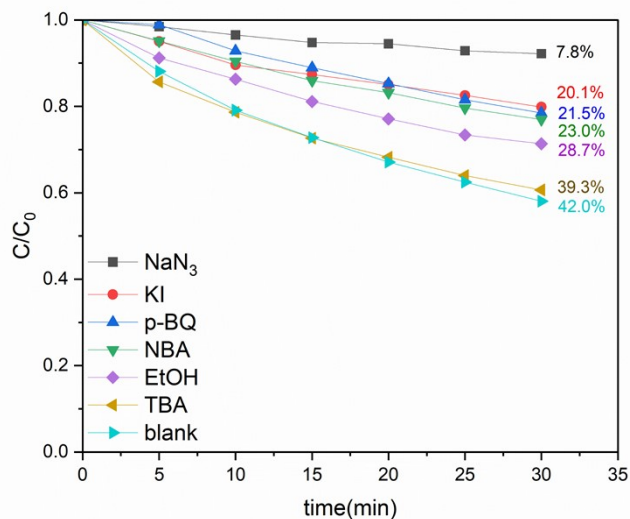

acid during synthesis.

Figure S3: Kinetic plot of trapping experiment using  $\text{CoO}$  as a catalyst in SR-AOPs. Reaction conditions:  $[\text{4-NP}]_0 = 40$  ppm;  $[\text{catalyst}] = 125$  mg/L;  $[\text{PMS}] = 1$  mM;  $[\text{trapping agent}] = 1$  mM.

**Table S2** ICP-MS result of the pristine  $\text{Co}_2\text{B}_2\text{O}_5$  nanoparticles and the solution after a standard SR-AOPs degradation reaction using  $\text{Co}_2\text{B}_2\text{O}_5$  as catalyst

| Sample | Element/Concentration                   | Co    | B     |
|--------|-----------------------------------------|-------|-------|
|        | $\text{Co}_2\text{B}_2\text{O}_5$ (ppm) | 71.50 | 20.71 |
|        | Weight percent in catalyst (%)          | 52.9  | 15.1  |
|        | Co and B leached in the solution (ppm)  | 21.22 | 7.715 |

**Table S3** Relative atomic percentage of  $\text{Co}^{2+}$  and  $\text{Co}^{3+}$  in pristine versus spent  $\text{Co}_2\text{B}_2\text{O}_5$

| Elements in different chemical states | Relative contents (at. %) |       |
|---------------------------------------|---------------------------|-------|
|                                       | Pristine                  | Spent |
| $\text{Co}^{2+}$                      | 39.8                      | 61.3  |
| $\text{Co}^{3+}$                      | 60.2                      | 38.7  |

## References

- [1] G. Yi, M. Ye, J. Wu, Y. Wang, Y. Long, G. Fan, Facile chemical blowing synthesis of interconnected N-doped carbon nanosheets coupled with  $\text{Co}_3\text{O}_4$  nanoparticles as superior peroxymonosulfate activators for p-nitrophenol destruction: Mechanisms and degradation pathways, *Appl. Surf. Sci.* 593 (2022) 153244. <https://doi.org/10.1016/j.apsusc.2022.153244>.
- [2] R. Luo, C. Liu, J. Li, C. Wang, X. Sun, J. Shen, W. Han, L. Wang, Convenient synthesis and engineering of ultrafine  $\text{Co}_3\text{O}_4$ -incorporated carbon composite: towards practical application of environmental remediation, *J. Mater. Chem. A* 6 (2018) 3454–3461. <https://doi.org/10.1039/C7TA11052A>.
- [3] Q. Wang, Z. Xu, Y. Cao, Y. Chen, X. Du, Y. Yang, Z. Wang, Two-dimensional ultrathin perforated  $\text{Co}_3\text{O}_4$  nanosheets enhanced PMS-Activated selective oxidation of organic micropollutants in environmental remediation, *Chem. Eng. J.* 427 (2022) 131953. <https://doi.org/10.1016/j.cej.2021.131953>.
- [4] J. Zhou, X. Yang, Q. Wei, Y. Lan, J. Guo,  $\text{Co}_3\text{O}_4$  anchored on biochar derived from chitosan ( $\text{Co}_3\text{O}_4@\text{BCC}$ ) as a catalyst to efficiently activate peroxymonosulfate (PMS) for degradation of phenacetin, *J. Environ. Manage.* 327 (2023) 116895. <https://doi.org/10.1016/j.jenvman.2022.116895>.
- [5] A. Wang, Y. Chen, Z. Zheng, H. Wang, X. Li, Z. Yang, R. Qiu, K. Yan, In situ N-doped carbon-coated mulberry-like cobalt manganese oxide boosting for visible light driving photocatalytic degradation of pharmaceutical pollutants, *Chem. Eng. J.* 411 (2021) 128497. <https://doi.org/10.1016/j.cej.2021.128497>.
- [6] L. Hu, X. Liu, A. Guo, J. Wu, Y. Wang, Y. Long, G. Fan, Cobalt with porous carbon architecture: Towards of 4-nitrophenol degradation and reduction, *Sep. Purif. Technol.* 288 (2022) 120595. <https://doi.org/10.1016/j.seppur.2022.120595>.
- [7] L. Wang, X. Guo, Y. Chen, S. Ai, H. Ding, Cobalt-doped g-C $_3\text{N}_4$  as a heterogeneous catalyst for photo-assisted activation of peroxymonosulfate for the degradation of organic contaminants, *Appl. Surf. Sci.* 467–468 (2019) 954–962. <https://doi.org/10.1016/j.apsusc.2018.10.262>.
- [8] P. He, C. Gu, B. Tang, Y. Zhou, M. Gan, J. Zhu, Expeditious degradation of SMX by high-valent cobalt-oxo species derived from cobalt-doped C $_3\text{N}_5$ -activated peroxymonosulfate with the assistance of visible light, *Sep. Purif. Technol.* 301 (2022) 122009. <https://doi.org/10.1016/j.seppur.2022.122009>.
- [9] L. Amirache, F. Barka-Bouaifel, P. Borthakur, M.R. Das, H. Ahouari, H. Vezin, A. Barras,

- B. Ouddane, S. Szunerits, R. Boukherroub, Cobalt sulfide-reduced graphene oxide: An efficient catalyst for the degradation of rhodamine B and pentachlorophenol using peroxymonosulfate, *J. Environ. Chem. Eng.* 9 (2021) 106018. <https://doi.org/10.1016/j.jece.2021.106018>.
- [10] A.M. Abdelghany, F.H. ElBatal, H.A. ElBatal, F.M. EzzElDin, Optical and FTIR structural studies of CoO-doped sodium borate, sodium silicate and sodium phosphate glasses and effects of gamma irradiation-a comparative study, *J. Mol. Struct.* 1074 (2014) 503–510. <https://doi.org/10.1016/j.molstruc.2014.06.011>.
- [11] A.S. Kipcak, M. Yildirim, S. Aydin Yuksel, E. Moroydor Derun, S. Piskin, The Synthesis and Physical Properties of Magnesium Borate Mineral of Admontite Synthesized from Sodium Borates, *Adv. Mater. Sci. Eng.* 2014 (2014) 1–9. <https://doi.org/10.1155/2014/819745>.
- [12] O.Y. Gumus, H.I. Unal, O. Erol, B. Sari, Synthesis, characterization, and colloidal properties of polythiophene/borax conducting composite, *Polym. Compos.* 32 (2011) 418–426. <https://doi.org/10.1002/pc.21057>.
- [13] H.T. Jang, E.M. Jung, S.H. Park, P. Hemalatha, Synthesis and Characterization of CoO-ZnO Catalyst System for Selective CO Oxidation, *Int. J. Control Autom.* 6 (2013) 31–40. <https://doi.org/10.14257/ijca.2013.6.6.04>.
- [14] S.Z. Mohammadi, B. Lashkari, A. Khosravan, Green synthesis of Co<sub>3</sub>O<sub>4</sub> nanoparticles by using walnut green skin extract as a reducing agent by using response surface methodology, *Surf. Interfaces* 23 (2021) 100970. <https://doi.org/10.1016/j.surfin.2021.100970>.
- [15] V. Sankar Devi, M. Athika, E. Duraisamy, A. Prasath, A. Selva Sharma, P. Elumalai, Facile sol-gel derived nanostructured spinel Co<sub>3</sub>O<sub>4</sub> as electrode material for high-performance supercapattery and lithium-ion storage, *J. Energy Storage* 25 (2019) 100815. <https://doi.org/10.1016/j.est.2019.100815>.
